# Supplementary material
Source: PubMed Central journal article supplement (PMC5726564)
Supplement: NIHMS909827-supplement-2.pdf [file NIHMS909827-supplement-2.pdf]

## Supplementary tables and supplementary notes

### Supplementary table 1: soma-targeting candidate proteins

| Name of protein                     | Was the protein fused to a fluorescent protein or an immunopeptide tag? If yes, was it an N-terminal or a C-terminal fusion? * | What was the soma targeting motif or peptide found?                                                                            | Was the soma-targeting fragment fused to a fluorescent protein or an immunopeptide tag? If yes, was it an N-terminal or a C-terminal fusion? * | How far from the soma, approximately, was the fluorescence detected using visual inspection?          | Did the sequence target an opsin to the soma or to the axon initial segment? If yes, what was the construct used?                                                                                                                                        | Linker we used between CoChR and the localization sequence |
|-------------------------------------|--------------------------------------------------------------------------------------------------------------------------------|--------------------------------------------------------------------------------------------------------------------------------|------------------------------------------------------------------------------------------------------------------------------------------------|-------------------------------------------------------------------------------------------------------|----------------------------------------------------------------------------------------------------------------------------------------------------------------------------------------------------------------------------------------------------------|------------------------------------------------------------|
| Nav1.6                              | Yes. N-terminal with GFP <sup>25</sup>                                                                                         | Nav1.6(II-III) <sup>25</sup> , a 27 amino acid sequence, from the intracellular loop between transmembrane domains II and III. | Yes. N-terminal <sup>25</sup><br>We made an N-terminal fusion.                                                                                 | Up to 20-70 $\mu$ m                                                                                   | Yes, to the axon hillock; Chr2-GFP-Nav1.6(II-III) <sup>30</sup>                                                                                                                                                                                          | N/A                                                        |
| Nav1.2                              | Yes. N-terminal with GFP <sup>25</sup>                                                                                         | Nav1.2(II-III) <sup>25</sup> , a 27 amino acid sequence, from the intracellular loop between transmembrane domains II and III. | Yes. N-terminal <sup>25</sup><br>We made an N-terminal fusion.                                                                                 | Up to 20-50 $\mu$ m                                                                                   | Yes, to the axon hillock; Chr2-YFP-Nav1.2(II-III) <sup>34</sup>                                                                                                                                                                                          | ggsggt                                                     |
| Soma restricted proteolipid (srPLP) | No. The protein was labeled with antibodies <sup>23</sup><br>We made both N- and C-terminal fusions with GFP.                  | N/A                                                                                                                            | N/A                                                                                                                                            | Up to > 100 $\mu$ m                                                                                   | N/A                                                                                                                                                                                                                                                      | N/A                                                        |
| DM20                                | No. The protein was labeled with antibodies <sup>23</sup><br>We made both N- and C-terminal fusions with GFP.                  | N/A                                                                                                                            | N/A                                                                                                                                            | Up to > 100 $\mu$ m                                                                                   | N/A                                                                                                                                                                                                                                                      | N/A                                                        |
| Ankyring                            | Yes. N-terminal with GFP <sup>29</sup>                                                                                         | Ankyring(837) <sup>31</sup> , from the N-terminal fragment of Ankyring.                                                        | No. N-terminal fusions were made with Chr2 or with eNpHR <sup>31</sup> . We made both N- and C-terminal fusions.                               | Up to 20-50 $\mu$ m<br>The C-terminal fusion had a 10-fold higher expression than the N-terminal one. | Yes, to the soma. Ankyring(837)-Chr2-mCherry and Ankyring(1-2512)-eNpHR -GFP <sup>31</sup> .<br>We made CoChR-Ankyring(1-2512)-GFP which was somatic and enabled photostimulation in expressing neurons. Was not packaged in AAVs due to its large size. | ggsggt                                                     |

|                   |                                                                                                       |                                                                                                                                                                               |                                                                                                  |                |                                                                                                                                                                                                                        |              |
|-------------------|-------------------------------------------------------------------------------------------------------|-------------------------------------------------------------------------------------------------------------------------------------------------------------------------------|--------------------------------------------------------------------------------------------------|----------------|------------------------------------------------------------------------------------------------------------------------------------------------------------------------------------------------------------------------|--------------|
| L1-R184Q          | Yes, N-terminal with GFP <sup>26</sup> . We made both N- and C-terminal fusions with GFP.             | N/A                                                                                                                                                                           | N/A                                                                                              | Up to 50-100µm | N/A                                                                                                                                                                                                                    | N/A          |
| Kv2.1             | Yes, a HA-tag was fused to the N-terminus of Kv2.1. <sup>24</sup> .                                   | Kv2.1-motif, a 65 amino acid sequence <sup>30</sup> from the C-terminal domain of Kv2.1.                                                                                      | No. C-terminal Fusions were made with ChR2 <sup>30</sup> . We made a C-terminal fusion with GFP. | Up to 60-150µm | Yes.. The expression of ChR2-YFP-Kv2.1-motif or NpHR-YFP-Kv2.1-motif <sup>30</sup> was somatodendritic. The expression of CoChR-GFP-Kv2.1-motif was somatodendritic (Figure S3).                                       | N/A          |
| KA2               | Yes, a myc-tag was fused to the N-terminus of KA2. We made both N and C fusions with GFP.             | KA2(1-150). To find it, we fragmented KA2 into (from N terminal to C terminal) into KA2_PART1 (360 amino acids), KA2_PART2 (360 amino acids) and KA2_PART3 (259 amino acids). | Yes, we made C and N terminal fusions of KA2(1-150) with GFP.                                    | Up to 20-50 µm | Yes, to the soma. We cloned KA2(1-150)-CoChR-GFP (average current in expressing cells was 130 pA ± 34 pA), and CoChR--KA2(1-150)-GFP average current in expressing cells was 720 pA ± 156 pA) which was named soCoChR. | gsgsgtggsggt |
| BiCD <sup>5</sup> | No, however FMRP was localized to the soma in neurons of fly larvae expressing BiCDr5 <sup>27</sup> . | Yes, in the BiCD <sup>5</sup> allele there is a stop codon after the first 50 codons (out of 782) <sup>28</sup> .                                                             | No. We made both N- and C-terminal fusions with GFP.                                             | Up to > 100 µm | N/A                                                                                                                                                                                                                    | N/A          |

\*N-terminal fusion means the organization of the final construct was: targeting\_sequence-GFP or targeting\_sequence-opsin, C-terminal fusion means the organization was: GFP-targeting\_sequence or opsin-targeting\_sequence.

## Supplementary Table 2: Statistical analyses for Figure S1

Figure S1d,e,f - GFP brightness versus position along a neurite, normalized to GFP brightness at the soma

Two-sample Kolmogorov-Smirnov (K-S) tests with Bonferroni correction were performed, comparing normalized GFP brightness at different positions along neurites, across different constructs. The overall significance level  $\alpha$  was set to 0.05, and the significance level of each individual K-S test was thus  $\alpha/11 = 0.0045$ . P values less than 0.0045 are highlighted below in bold. For GFP, n = 5 neurites from 3 cells from 2 cultures. For KA2-GFP, n = 5 neurites from 3 cells from 2 cultures. For KA2(1-150)-GFP, n = 5 neurites from 3 cells from 2 cultures.

### GFP vs. KA2-GFP:

|                                               |        |               |        |        |        |        |
|-----------------------------------------------|--------|---------------|--------|--------|--------|--------|
| Distance along neurite from soma (in microns) | 0      | 10            | 20     | 30     | 40     | 50     |
| p-value                                       | 0.6974 | 0.2090        | 0.0361 | 0.0361 | 0.0361 | 0.0361 |
| Distance along neurite from soma (in microns) | 60     | 70            | 80     | 90     | 100    | -      |
| p-value                                       | 0.0361 | <b>0.0038</b> | 0.0361 | 0.0361 | 0.0361 | -      |

### GFP vs. KA2(1-150)-GFP:

|                                               |               |               |               |               |               |        |
|-----------------------------------------------|---------------|---------------|---------------|---------------|---------------|--------|
| Distance along neurite from soma (in microns) | 0             | 10            | 20            | 30            | 40            | 50     |
| p-value                                       | 0.0361        | <b>0.0038</b> | <b>0.0038</b> | <b>0.0038</b> | <b>0.0038</b> | 0.0361 |
| Distance along neurite from soma (in microns) | 60            | 70            | 80            | 90            | 100           | -      |
| p-value                                       | <b>0.0038</b> | 0.0361        | 0.0361        | 0.0361        | 0.0361        | -      |

### KA2-GFP vs. KA2(1-150)-GFP:

|                                               |               |               |        |        |        |        |
|-----------------------------------------------|---------------|---------------|--------|--------|--------|--------|
| Distance along neurite from soma (in microns) | 0             | 10            | 20     | 30     | 40     | 50     |
| p-value                                       | <b>0.0038</b> | <b>0.0038</b> | 0.2090 | 0.2090 | 0.0361 | 0.6974 |
| Distance along neurite from soma (in microns) | 60            | 70            | 80     | 90     | 100    | -      |
| p-value                                       | 0.6974        | 0.6974        | 0.6974 | 0.6974 | 0.6974 | -      |

**Supplementary Table 3: Statistical analyses for Figures 1, 2, S3 and S4**

Figure 1m,n - GFP brightness versus position along a neurite, normalized to GFP brightness at the soma

Two-sample Kolmogorov-Smirnov (K-S) tests with Bonferroni correction for normalized GFP brightness at different positions along neurites, comparing across different constructs. The overall significance level  $\alpha$  was set to 0.05, and the significance level of each individual K-S test was thus  $\alpha/11 = 0.0045$ . P values less than 0.0045 are highlighted in bold, below. For CoChR-GFP, n = 7 neurites from 5 cells from 2 cultures. For CoChR-KA2(1-150)-GFP, n = 9 neurites from 7 cells from 3 cultures. For CoChR-Nav1.2(II/III)-GFP, n = 5 neurites from 5 cells from 4 cultures.

CoChR-GFP vs. CoChR-KA2(1-150)-GFP:

|                                               |                |                |                |                |                |                |
|-----------------------------------------------|----------------|----------------|----------------|----------------|----------------|----------------|
| Distance along neurite from soma (in microns) | 0              | 10             | 20             | 30             | 40             | 50             |
| p-value                                       | <b>0.00018</b> | <b>0.00018</b> | 0.01112        | 0.01714        | 0.01112        | <b>0.00126</b> |
| Distance along neurite from soma (in microns) | 60             | 70             | 80             | 90             | 100            | -              |
| p-value                                       | <b>0.00221</b> | <b>0.00036</b> | <b>0.00213</b> | <b>0.00213</b> | <b>0.00213</b> | -              |

CoChR-GFP vs. CoChR-Nav1.2(II/III)-GFP:

|                                               |         |         |         |         |         |         |
|-----------------------------------------------|---------|---------|---------|---------|---------|---------|
| Distance along neurite from soma (in microns) | 0       | 10      | 20      | 30      | 40      | 50      |
| p-value                                       | 0.2999  | 0.61557 | 0.2999  | 0.05179 | 0.01038 | 0.01038 |
| Distance along neurite from soma (in microns) | 60      | 70      | 80      | 90      | 100     | -       |
| p-value                                       | 0.01833 | 0.01833 | 0.05292 | 0.05292 | 0.2587  | -       |

CoChR-KA2(1-150)-GFP vs. CoChR-Nav1.2(II/III)-GFP:

|                                               |         |         |         |         |         |         |
|-----------------------------------------------|---------|---------|---------|---------|---------|---------|
| Distance along neurite from soma (in microns) | 0       | 10      | 20      | 30      | 40      | 50      |
| p-value                                       | 0.12085 | 0.12085 | 0.30923 | 0.30923 | 0.90097 | 0.56102 |
| Distance along neurite from soma (in microns) | 60      | 70      | 80      | 90      | 100     | -       |
| p-value                                       | 0.56102 | 0.56102 | 0.12085 | 0.56102 | 0.12085 | -       |

Figure 1p – Photocurrent

Wilcoxon rank sum test for photocurrent values:

| Molecule             | # of cells |
|----------------------|------------|
| CoChR-GFP            | 13         |
| CoChR-KA2(1-150)-GFP | 13         |

|                         |         |
|-------------------------|---------|
| P-value                 | 0.6444  |
| z-statistic             | -0.4615 |
| rank sum test statistic | 166     |

Figure 1q -  $\tau_{off}$

Wilcoxon rank sum test for  $\tau_{off}$  values:

| Molecule             | # of cells |
|----------------------|------------|
| CoChR-GFP            | 13         |
| CoChR-KA2(1-150)-GFP | 13         |

|                         |            |
|-------------------------|------------|
| P-value                 | 2.5928e-05 |
| z-statistic             | 4.2066     |
| rank sum test statistic | 258        |

Figure 2c, d – distances of photostimulated neurons from the patched cell

The patched cell is cell #1

| Cell #                                                        | Cell 2 | Cell 3 | Cell 4 | Cell 5 | Cell 6 | Cell 7 | Cell 8 | Cell 9 | Cell 10 |
|---------------------------------------------------------------|--------|--------|--------|--------|--------|--------|--------|--------|---------|
| Average distance from cell 1 in CoChR expressing cultures     | 24     | 36     | 42     | 82     | 76     | 108    | 80     | 116    | 128     |
| s.e.m. of distance from cell 1 in CoChR expressing cultures   | 5      | 16     | 7      | 22     | 15     | 13     | 18     | 20     | 12      |
| Average distance from cell 1 in soCoChR expressing cultures   | 16     | 32     | 44     | 74     | 80     | 92     | 82     | 120    | 128     |
| s.e.m. of distance from cell 1 in soCoChR expressing cultures | 2      | 5      | 16     | 17     | 6      | 10     | 10     | 18     | 14      |

Wilcoxon rank sum test for distances of photostimulated neurons from the patched cell:

| Patched cells expressing: | # of cells | Distance of photostimulated cells from patched cell |
|---------------------------|------------|-----------------------------------------------------|
| CoChR-GFP                 | 5          | 76.89 ± 6.98 μm                                     |
| CoChR-KA2(1-150)-GFP      | 5          | 74.22 ± 6.50 μm                                     |

|                         |         |
|-------------------------|---------|
| P-value                 | 0.9488  |
| rank sum test statistic | 86.5000 |

Figure 2h –Percentage of photostimulated neighboring cells that yielded an AP in each patched cell

Wilcoxon rank sum test for photocurrent values:

| Molecule             | # of cells |
|----------------------|------------|
| CoChR-GFP            | 5          |
| CoChR-KA2(1-150)-GFP | 5          |

|                         |        |
|-------------------------|--------|
| P-value                 | 0.0476 |
| rank sum test statistic | 17.5   |

Figure 2i - percentage of photostimulated neighboring cells that yielded a depolarization in each patched cell

| Molecule             | # of patched cells |
|----------------------|--------------------|
| CoChR-GFP            | 5                  |
| CoChR-KA2(1-150)-GFP | 5                  |

Wilcoxon rank sum test of the percentage of photostimulated neighboring cells that yielded a depolarization in each patched cell, between CoChR-GFP and CoChR-KA2(1-150)-GFP:

|                         |        |
|-------------------------|--------|
| P-value                 | 0.0079 |
| rank sum test statistic | 15     |

Number of total depolarization events:

| Molecule             | # of depolarization events |
|----------------------|----------------------------|
| CoChR-GFP            | 16                         |
| CoChR-KA2(1-150)-GFP | 2                          |

CoChR-GFP membrane potential increase (mV) in each depolarization event:

|   |   |   |    |    |   |    |   |
|---|---|---|----|----|---|----|---|
| 2 | 3 | 9 | 10 | 12 | 7 | 6  | 5 |
| 5 | 4 | 4 | 7  | 6  | 6 | 10 | 2 |

Average: 6.125mV

CoChR-KA2(1-150)-GFP membrane potential increase (mV) in each depolarization event:

|   |   |
|---|---|
| 4 | 6 |
|---|---|

Average: 5mV

Wilcoxon rank sum test of membrane potential increases in depolarization events between CoChR-GFP and CoChR-KA2(1-150)-GFP:

|                         |       |
|-------------------------|-------|
| P-value                 | 0.732 |
| rank sum test statistic | 15.5  |

### Figure S3

Two-sample Kolmogorov-Smirnov (K-S) tests with Bonferroni correction for normalized GFP brightness at different positions along neurites, comparing across constructs. The overall significance level  $\alpha$  was set to 0.05, and the significance level of each individual K-S test was thus  $\alpha/11 = 0.0045$ . P values less than 0.0045 are highlighted below in bold. For CoChR-GFP,  $n = 7$  neurites from 5 cells from 2 cultures. For CoChR-GFP-Kv2.1<sub>motif</sub>,  $n = 5$  neurites from 5 cells from 2 cultures.

CoChR-GFP vs. CoChR-GFP-Kv2.1<sub>motif</sub>:

|                                               |        |        |        |        |        |        |
|-----------------------------------------------|--------|--------|--------|--------|--------|--------|
| Distance along neurite from soma (in microns) | 0      | 10     | 20     | 30     | 40     | 50     |
| p-value                                       | 0.0518 | 0.0518 | 0.5264 | 0.5264 | 0.5264 | 0.5264 |
| Distance along neurite from soma (in microns) | 60     | 70     | 80     | 90     | 100    | -      |
| p-value                                       | 0.8471 | 0.3670 | 0.4772 | 0.4772 | 0.4772 | -      |

Figure S4 B – Blue light driven spike probability as a function of irradiance for CoChR-GFP and soCoChR-GFP expressing cells.  $n = 6$  cells for each opsin.

Bonferroni-corrected Wilcoxon rank sum tests for spike probability at each irradiance, comparing across constructs. The overall significance level  $\alpha$  was set to 0.05, and the significance level of each individual Wilcoxon rank sum test was thus  $\alpha/6 = 0.0083$ .

|         | 1mW      | 2mW      | 3mW      | 5mW | 7mW | 10mW |
|---------|----------|----------|----------|-----|-----|------|
| P       | 0.909091 | 0.848485 | 0.242424 | 1   | 1   | 1    |
| Ranksum | 33       | 33.5     | 37.5     | 30  | 30  | 30   |

Figure S4 C – Blue light driven photocurrents as a function of irradiance for CoChR and soCoChR expressing cells. n = 7 cells for each opsin.

Bonferroni-corrected Wilcoxon rank sum tests for photocurrents at each irradiance. The overall significance level  $\alpha$  was set to 0.05, and the significance level of each individual Wilcoxon rank sum test was  $\alpha/6 = 0.0083$ .

|         | 1mW      | 2mW      | 3mW      | 5mW | 7mW      | 10mW     |
|---------|----------|----------|----------|-----|----------|----------|
| P       | 0.600233 | 0.364219 | 0.710373 | 1   | 0.455711 | 0.534965 |
| Ranksum | 48.5     | 60       | 56       | 53  | 59       | 58       |

Figure S4 D – Blue light driven spike probability as a function of stimulation frequency for CoChR and soCoChR expressing cells. n = 7 - 10 cells for each opsin.

Bonferroni-corrected Wilcoxon rank sum tests for spike probability at each stimulation frequency. The overall significance level  $\alpha$  was set to 0.05, and the significance level of each individual Wilcoxon rank sum test was  $\alpha/5 = 0.01$ .

|         | 5Hz | 10Hz     | 20Hz     | 40Hz    | 60Hz     |
|---------|-----|----------|----------|---------|----------|
| P       | 1   | 0.823529 | 0.289593 | 0.07281 | 0.211024 |
| Ranksum | 63  | 58       | 51.5     | 45      | 51       |



**Supplementary Table 4: Statistical analysis for Figure 3 and 5**

Figure 3e – Normalized photocurrent integral generated by a photostimulation spot placed on neurites at different distances from the soma for CoChR-GFP and soCoChR-GFP expressing cells. The current integral is normalized to the current integral value obtained with the photostimulation spot at the soma.

Two-sample Kolmogorov-Smirnov test with Bonferroni correction for normalized integrated photocurrent for photostimulation along neurites. The current integral values were binned according to their distance from soma in intervals of 15 µm. The overall significance level  $\alpha$  of the test was set to 0.05, and the significance level of each individual K-S test was  $\alpha/6 = 0.0083$ . P values less than 0.0083 are highlighted in bold.

For CoChR-GFP, n=16 neurites from 8 cells from 7 mice.

For soCoChR-GFP, n=27 neurites from 16 cells from 13 mice.

|                                               |        |        |               |               |                |               |               |
|-----------------------------------------------|--------|--------|---------------|---------------|----------------|---------------|---------------|
| Distance from soma along neurite (in microns) | 0-Soma | 15     | 30            | 45            | 60             | 75            | 90            |
| n points per binning interval - CoChR-GFP     | 16     | 30     | 18            | 27            | 22             | 24            | 15            |
| n points per binning interval - soCoChR-GFP   | 27     | 40     | 29            | 36            | 29             | 19            | 14            |
| P-value                                       | 1      | 0.4627 | <b>0.0006</b> | <b>0.0001</b> | <b>0.00001</b> | <b>0.0013</b> | <b>0.0002</b> |

Percentage of photostimulation events, at a given distance from the soma along a neurite, for soCoChR expressing cells, generating a peak current lower than the lowest peak current induced among all the investigated neurites of CoChR expressing cells, and measured for stimulation at the same distance from the soma. Current peaks are evaluated on traces resulting from the average of 1 to 3 trials of photostimulation per site. The data correspond to the experiments reported in Fig. 3e and in Supplementary Figure S10.

|                                                                                                                                                                                                                                                                                       |    |    |    |    |    |     |
|---------------------------------------------------------------------------------------------------------------------------------------------------------------------------------------------------------------------------------------------------------------------------------------|----|----|----|----|----|-----|
| Distance from soma along neurite (in microns)                                                                                                                                                                                                                                         | 15 | 30 | 45 | 60 | 75 | 90  |
| % of photostimulation events at a given distance from soma along a neurite of soCoChR expressing cells generating a peak current lower than the lowest average peak current induced among all the investigated neurites of CoChR expressing cells at the same distance from the soma. | 50 | 75 | 81 | 86 | 68 | 100 |

Figure 5e – Average distances of neighboring cells from the patched cell for CoChR-GFP and CoChR-KA2(1-150)-GFP expressing cells.

For each patched cell, the average distance across the neighboring stimulated cells is calculated. The resulting distances are then averaged over patched cells. Data are reported in Supplementary Figure S12.

A Wilcoxon rank sum test was performed between the average distances for the patched cells for CoChR-GFP and CoChR-KA2(1-150)-GFP expressing cells.

For CoChR-GFP, n=7 patched cells from 6 mice;

For CoChR-KA2(1-150)-GFP, n=7 patched cells from 7 mice).

| Patched cells expressing: | # of cells | Distance of photostimulated cells from patched cell |
|---------------------------|------------|-----------------------------------------------------|
| CoChR-GFP                 | 7          | 55.7 ± 9.6µm                                        |
| CoChR-KA2(1-150)-GFP      | 7          | 62.2 ± 5.3 µm                                       |

|         |        |
|---------|--------|
| P-value | 0.0728 |
|---------|--------|

Figure 5e - Percentage of sequentially photostimulated neighboring cells that yielded action potentials in the patched cell.

Wilcoxon rank sum test for percentage values:

| Molecule             | # of cells |
|----------------------|------------|
| CoChR-GFP            | 7          |
| CoChR-KA2(1-150)-GFP | 7          |

|         |       |
|---------|-------|
| P-value | 0.004 |
|---------|-------|

Figure 5g - Percentage of simultaneously photostimulated neighboring cells that yielded one action potential in the patched cell.

$\chi^2$ -test:

| Molecule             | # of cells |
|----------------------|------------|
| CoChR-GFP            | 7          |
| CoChR-KA2(1-150)-GFP | 7          |

|          |       |
|----------|-------|
| $\chi^2$ | 3.97  |
| df       | 1     |
| P-value  | 0.046 |

Percentage of simultaneously photostimulated neighboring cells that yielded more than one action potential in the patched cell.

$\chi^2$ -test:

| Molecule             | # of cells |
|----------------------|------------|
| CoChR-GFP            | 7          |
| CoChR-KA2(1-150)-GFP | 7          |

|          |      |
|----------|------|
| $\chi^2$ | 3.15 |
| df       | 1    |
| P-value  | 0.08 |

### Supplementary Table 5: Statistical analysis for Figure 6

Figure 6c - Comparison of artifactual mean peak currents when sequentially photostimulating neighboring cells.

Wilcoxon rank sum test for percentage values:

|                      |            |
|----------------------|------------|
| Molecule             | # of cells |
| CoChR-GFP            | 4          |
| CoChR-KA2(1-150)-GFP | 5          |
| P-value              | 0.015      |

Figure 6d - Comparison of the PSC current/ $I_{ART}$  ratio when sequentially photostimulating neighboring cells..

Wilcoxon rank sum test for percentage values:

|                      |            |
|----------------------|------------|
| Molecule             | # of cells |
| CoChR-GFP            | 4          |
| CoChR-KA2(1-150)-GFP | 5          |
| P-value              | 0.003      |

## Supplementary information

### Amino acid sequence of KA2(1-150):

MPAELLLLLIVAFANPSCQVLSSLRMAAILDDQTVCGRGERLALALAREQINGIIEVPAK  
ARVEVDIFELQRDSQYETTTDTMCQILPKGVVSVLGPSSSPASASTVSHICGEKEIPHIKVG  
PEETPRLQYLRFASVSLYPSNEDVSLAVS

### Amino acid sequence of soCoChR:

MLGNLSAIVPIDQCFCLAWTDSLGSDEQLVANILQWFAFGFSILILMFYAYQTW  
RATCGWEEVYVCCVELTKVIIIEFFHEFDDPSMLYLANGHRVQWLRYAEWLLTCPVILIH  
LSNLTGLKDDYSKRTMRLVSDVGTIVWGATSAMSTGYVKVIFVVLGCIYGANTFFHA  
AKVYIESYHVVPKGRPRTVVRIMAWLFFLSWGMFPVLFVVGPEGFDAISVYGSTIGHTII  
DLMSKNCWGLLGHYLRVLIHQHIIYGDIRKKTIN VAGEEMEVEVETMVDQEDEETVGGG  
GGTGGSGGTMPAELLLLLIVAFANPSCQVLSSLRMAAILDDQTVCGRGERLALALAREQ  
INGIIEVPAKARVEVDIFELQRDSQYETTTDTMCQILPKGVVSVLGPSSSPASASTVSHICGE  
KEIPHIKVGPEETPRLQYLRFASVSLYPSNEDVSLAVSGASGGTVSKGEELFTGVVPILVE  
LDGDVNGHKFSVSGEGEGDATYGKLTCLKFICTTGKLPVPWPTLVTTLYGVQCFSRYPD  
HMKQHDFFKSAMPEGYVQERTIFFKDDGNYKTRAEVKFEGDTLVNRIELKGIDFKEDG  
NILGHKLEYNYNVYIMADKQKNGIKVNFKIRHNIEDGSVQLADHYQQNTPIGDGPV  
LLPDNHYLSTQSALSKDPNEKRDHMLLEFVTAAGITLGMDELYK
